# Supplementary material for: Intestinal Epithelial Cells and the Microbiome Undergo Swift Reprogramming at the Inception of Colonic Citrobacter rodentium Infection
Source: PubMed Central journal article supplement (PMC6445932; doi:10.1128/mbio.00062-19), 2019-04-02
Supplement: mBio.00062-19-st001.pdf [file mBio.00062-19-st001.pdf]

**Table S1.** TMT-labels, pooled samples and mice selected for proteomics analysis. Mice that did not reach the colonisation threshold set were excluded from processing.

| <b>Sample</b>   | <b>1</b>                        | <b>2</b>                        | <b>3</b>                        | <b>4</b>                        | <b>5</b>                 | <b>6</b>                 | <b>7</b>                        | <b>8</b>                        | <b>9</b>                        |
|-----------------|---------------------------------|---------------------------------|---------------------------------|---------------------------------|--------------------------|--------------------------|---------------------------------|---------------------------------|---------------------------------|
| TMT label       | 127C                            | 128N                            | 128C                            | 129N                            | 129C                     | 130N                     | 130C                            | 131N                            | 131C                            |
| Group           | R1-Mock                         | R1-4DPI                         | R1-6DPI                         | R2-Mock                         | R2-4DPI                  | R2-6DPI                  | R3-Mock                         | R3-4DPI                         | R3-6DPI                         |
| Individual mice | 1.1<br>1.2<br>1.3<br>1.4<br>1.5 | 2.1<br>2.2<br>2.3<br>2.4<br>2.5 | 3.1<br>3.2<br>3.3<br>3.4<br>3.5 | 1.1<br>1.2<br>1.3<br>1.4<br>1.5 | 2.1<br>2.2<br>2.4<br>2.5 | 3.1<br>3.2<br>3.3<br>3.4 | 1.1<br>1.2<br>1.3<br>1.4<br>1.5 | 2.1<br>2.2<br>2.3<br>2.4<br>2.5 | 3.1<br>3.2<br>3.3<br>3.4<br>3.5 |
